# Supplementary material for: Inclusion complexes of propiconazole nitrate with substituted β-cyclodextrins: the synthesis and in silico and in vitro assessment of their antifungal properties
Source: Royal Society of Chemistry journal article supplement (doi:10.1039/c5nj01811k), 2015-12-09

## New Journal of Chemistry

### Electronic Supplementary Information for

#### Inclusion complexes of propiconazole nitrate with substituted $\beta$ -cyclodextrins.

#### Synthesis, *in silico* and *in vitro* assessment of antifungal properties.

Bogdan Minea,<sup>a,b</sup> Narcisa Marangoci,<sup>a</sup> Dragos Peptanariu,<sup>a</sup> Irina Rosca,<sup>a</sup> Valentin Nastasa,<sup>c</sup> Andreia Corciova,<sup>b</sup> Cristian-Dragos Varganici,<sup>a</sup> Alina Nicolescu,<sup>a</sup> Adrian Fifere,<sup>a</sup> Andrei Neamtu,<sup>b</sup> Mihai Mares,<sup>c</sup> Mihail Barboiu,<sup>d,\*</sup> Mariana Pinteala<sup>a,\*</sup>

### Computational studies

**SI 1:** PCZH-NO<sub>3</sub> – sugar ring center of mass (COM) distances plotted over the simulation time for the two analyzed modes of inclusion: with **[A]** the propyl group and **[B]** the dichlorophenyl group, respectively, inserted in the cyclodextrins central cavity. Graphs show no dissociation events, with COM distances below 0.7 nm in all cases. Higher fluctuations can be observed for SBE7- $\beta$ -CD/PCZH-NO<sub>3</sub> complexes due to the higher flexibility of these assemblies.

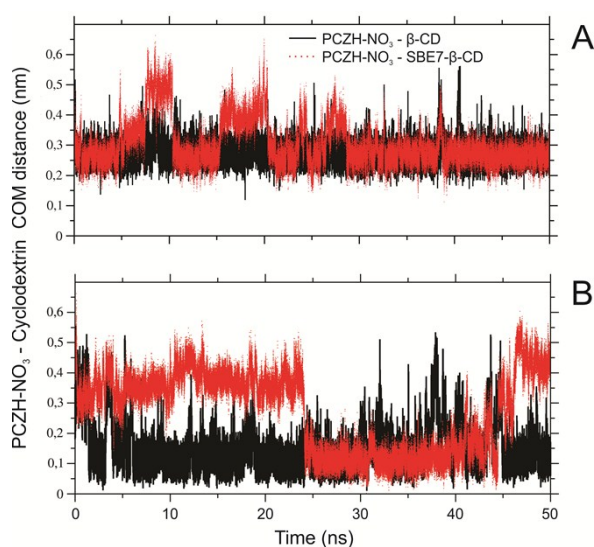

**SI 2:** Molecular dynamics snapshots of the PCZH-NO<sub>3</sub> complexes for the two analyzed modes of inclusion. The first column represents ensembles of six equally time distributed conformations, fitted with respect of the sugar ring residues. The last column shows only the sugar ring residues ensembles. Higher flexibility can be observed for SBE7- $\beta$ -CD/PCZH-NO<sub>3</sub> complexes. The fluctuations of the sugar ring conformations are higher for SBE7- $\beta$ -CD/PCZH-NO<sub>3</sub> than for  $\beta$ -CD/PCZH-NO<sub>3</sub> inclusion compounds.

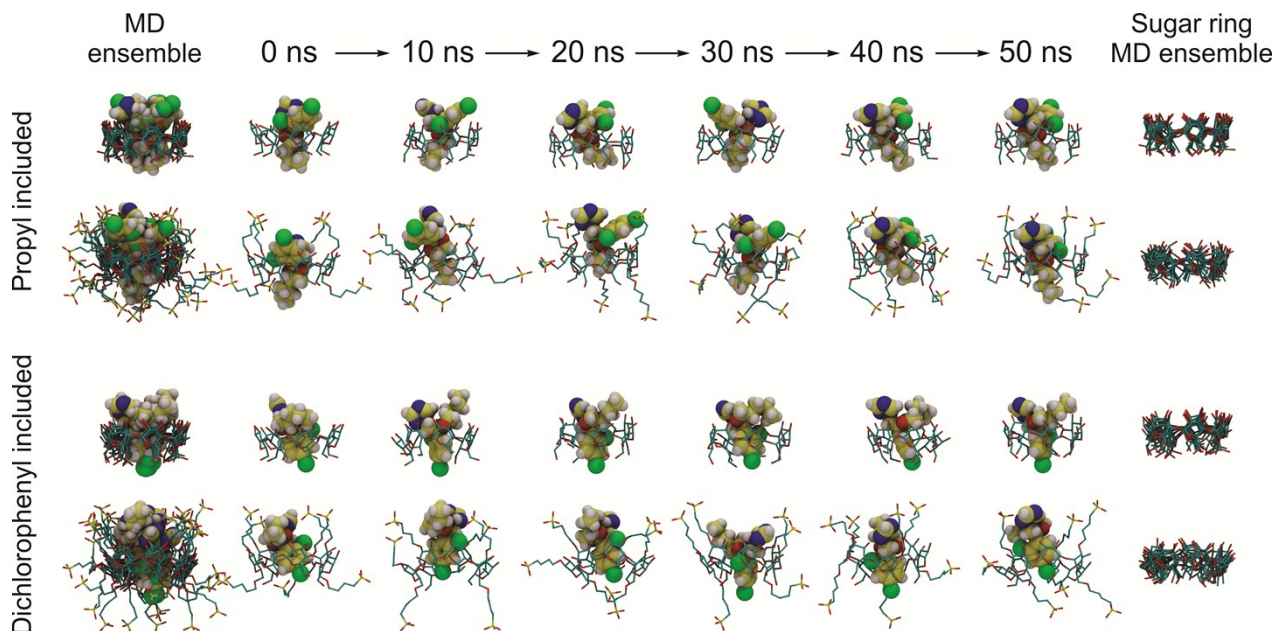

Supplement: c5nj01811k1.pdf [file c5nj01811k1.pdf]
